# Supplementary material for: Synthesis, characterization, and H/D exchange of μ-hydride-containing [FeFe]-hydrogenase subsite models formed by protonation reactions of (μ-TDT)Fe2(CO)4(PMe3)2 (TDT = SCH2SCH2S) with protic acids
Source: Royal Society of Chemistry journal article supplement (doi:10.1039/c5dt04297f), 2016-01-01
Supplement: c5dt04297f1.pdf [file c5dt04297f1.pdf]

## Supporting Information

**Synthesis, characterization, and H/D exchange of  $\mu$ -hydride-containing [FeFe]-hydrogenase subsite models formed by protonation reactions of  $(\mu\text{-TDT})\text{Fe}_2(\text{CO})_4(\text{PMe}_3)_2$  (TDT =  $\text{SCH}_2\text{SCH}_2\text{S}$ ) with protic acids**

Li-Cheng Song,\*<sup>1,2</sup> An-Guo Zhu,<sup>1,2</sup> and Yuan-Qiang Guo<sup>1,2</sup>

<sup>1</sup>Department of Chemistry, State Key Laboratory of Elemento-Organic Chemistry,

<sup>2</sup>Collaborative Innovation Center of Chemical Science and Engineering (Tianjin)

Nankai University, Tianjin 300071, China

## Contents:

|                                                                  |                                                                                                                                                                                                         |          |
|------------------------------------------------------------------|---------------------------------------------------------------------------------------------------------------------------------------------------------------------------------------------------------|----------|
| <b>Table S1</b>                                                  | Selected bond lengths (Å) and angles (°) for <b>1</b> .....                                                                                                                                             | page S3  |
| <b>Table S2</b>                                                  | Selected bond lengths (Å) and angles (°) for <b>3–5</b> .....                                                                                                                                           | page S3  |
| <b>Table S3</b>                                                  | In situ <sup>1</sup> H NMR data of μ-H in complexes <b>2–7</b> taken after the 5 min<br>protonation reactions of complex <b>1</b> with the corresponding acids.....                                     | page S4  |
| <b>Table S4</b>                                                  | In situ <sup>31</sup> P{ <sup>1</sup> H} NMR data of complexes <b>2–7</b> taken after the 5 min<br>protonation reactions of complex <b>1</b> with the corresponding acids.....                          | page S5  |
| <b>Table S5</b>                                                  | In situ <sup>1</sup> H NMR data of μ-H in complex <b>5</b> taken at time intervals during<br>the protonation reactions of complex <b>1</b> with HBF <sub>4</sub> ·Et <sub>2</sub> O.....                | page S6  |
| <b>Table S6</b>                                                  | In situ <sup>31</sup> P{ <sup>1</sup> H} NMR data of complex <b>5</b> taken at time intervals during<br>the protonation reactions of complex <b>1</b> with HBF <sub>4</sub> ·Et <sub>2</sub> O.....     | page S7  |
| <b>Table S7</b>                                                  | Selected bond lengths (Å) and angles (°) for <b>8</b> .....                                                                                                                                             | page S7  |
| <b>Table S8</b>                                                  | Crystal data and structure refinements details for <b>1, 3, and 4</b> .....                                                                                                                             | page S8  |
| <b>Table S9</b>                                                  | Crystal data and structure refinements details for <b>5 and 8</b> .....                                                                                                                                 | page S9  |
| <b>Fig. S1</b>                                                   | In situ <sup>1</sup> H NMR spectra of μ-H in complexes <b>2–7</b> taken after the 5 min<br>protonation reactions of complex <b>1</b> with the corresponding acids. ....                                 | page S10 |
| <b>Fig. S2</b>                                                   | In situ <sup>31</sup> P{ <sup>1</sup> H} NMR spectra of complexes <b>2–7</b> taken after the 5 min protonation<br>reactions of complex <b>1</b> with the corresponding acids. ....                      | page S10 |
| <b>Fig. S3</b>                                                   | In situ <sup>1</sup> H NMR spectra of μ-H in complex <b>5</b> taken at time intervals<br>during the protonation reactions of complex <b>1</b> with HBF <sub>4</sub> ·Et <sub>2</sub> O. ....            | page S11 |
| <b>Fig. S4</b>                                                   | In situ <sup>31</sup> P{ <sup>1</sup> H} NMR spectra in complex <b>5</b> taken at time intervals during<br>the protonation reactions of complex <b>1</b> with HBF <sub>4</sub> ·Et <sub>2</sub> O. .... | page S11 |
| <b>Discussion of the unsuccessful H/D exchange results</b> ..... |                                                                                                                                                                                                         | page S12 |

**Table S1** Selected bond lengths (Å) and angles (°) for **1**

|                  |            |                   |            |
|------------------|------------|-------------------|------------|
| Fe(1)–C(2)       | 1.750(4)   | Fe(1)–S(1A)       | 2.2498(12) |
| Fe(1)–C(1)       | 1.758(4)   | Fe(1)–Fe(1A)      | 2.5710(14) |
| Fe(1)–P(1)       | 2.2333(12) | S(1)–C(6)         | 1.831(4)   |
| Fe(1)–S(1)       | 2.2481(12) | S(1A)–C(6)        | 1.709(4)   |
| C(1)–Fe(1)–P(1)  | 96.15(13)  | Fe(1)–S(1)–Fe(1A) | 69.72(4)   |
| C(1)–Fe(1)–S(1)  | 105.32(12) | S(1)–Fe(1)–S(1A)  | 85.65(4)   |
| P(1)–Fe(1)–S(1)  | 89.50(5)   | C(6)–S(1A)–C(6A)  | 99.4(2)    |
| P(1)–Fe(1)–S(1A) | 162.28(4)  | C(3)–P(1)–Fe(1)   | 113.0(4)   |

**Table S2** Selected bond lengths (Å) and angles (°) for **3–5**

|                   |            |                   |            |
|-------------------|------------|-------------------|------------|
| <b>3</b>          |            |                   |            |
| P(1)–C(3)         | 1.813(3)   | S(1)–Fe(2)        | 2.2783(6)  |
| P(1)–Fe(1)        | 2.2588(7)  | Fe(1)–Fe(2)       | 2.5774(4)  |
| S(1)–Fe(1)        | 2.2645(7)  | Fe(1)–H(1)        | 1.6297     |
| S(1)–Fe(1)–Fe(2)  | 55.687(17) | C(1)–S(1)–Fe(1)   | 113.05(9)  |
| P(1)–Fe(1)–Fe(2)  | 109.72(2)  | C(4)–P(1)–Fe(1)   | 114.57(10) |
| S(3)–Fe(1)–Fe(2)  | 55.083(17) | C(9)–Fe(1)–Fe(2)  | 112.64(7)  |
| Fe(1)–S(1)–Fe(2)  | 69.13(2)   | Fe(1)–Fe(2)–H     | 37.9       |
| <b>4</b>          |            |                   |            |
| P(1)–C(4)         | 1.786(5)   | Fe(1)–C(1)        | 1.775(4)   |
| P(1)–Fe(1)        | 2.2580(11) | Fe(1)–Fe(1A)      | 2.5799(10) |
| S(1)–Fe(1)        | 2.2536(11) | Fe(1)–H(1)        | 1.67(3)    |
| S(1)–Fe(1)–Fe(1A) | 55.85(3)   | C(3)–S(1)–Fe(1)   | 111.4(3)   |
| P(1)–Fe(1)–S(1)   | 165.75(4)  | C(4)–P(1)–Fe(1)   | 114.7(2)   |
| P(1)–Fe(1)–Fe(1A) | 111.40(3)  | C(1)–Fe(1)–Fe(1A) | 141.66(16) |
| Fe(1)–S(1)–Fe(1A) | 69.33(3)   | Fe(1)–Fe(1A)–H    | 39.5(14)   |
| <b>5</b>          |            |                   |            |
| P(1)–C(3)         | 1.814(8)   | S(1)–Fe(2)        | 2.306(16)  |
| P(1)–Fe(1)        | 2.238(2)   | Fe(1)–Fe(2)       | 2.5721(15) |
| S(1)–Fe(1)        | 2.258(17)  | Fe(1)–H(1)        | 1.5810     |
| S(1)–Fe(1)–Fe(2)  | 56.6(5)    | C(2)–S(3)–Fe(1)   | 117.0(5)   |
| P(1)–Fe(1)–Fe(2)  | 111.93(6)  | C(3)–P(1)–Fe(1)   | 114.8(3)   |
| S(3)–Fe(1)–Fe(2)  | 59.79(14)  | C(9)–Fe(1)–Fe(2)  | 139.3(3)   |
| Fe(1)–S(1)–Fe(2)  | 68.6(4)    | Fe(1)–Fe(2)–H     | 35.5       |

**Table S3.** In situ  $^1\text{H}$  NMR data of  $\mu\text{-H}$  in complexes **2–7** taken after the 5 min protonation reactions of complex **1** with the corresponding acids

| complex  | spectral data/isomer assignment                    | molar ratio                     |
|----------|----------------------------------------------------|---------------------------------|
|          |                                                    | trans-ba/ba : cis-ba/ba : ap/ba |
| <b>2</b> | -15.02 (t, $J_{\text{P-H}} = 21.2$ Hz)/trans-ba/ba | only trans-ba/ba                |
|          | -15.00 (t, $J_{\text{P-H}} = 21.6$ Hz)/trans-ba/ba |                                 |
| <b>3</b> | -14.67 (t, $J_{\text{P-H}} = 20.0$ Hz)/cis-ba/ba   | 6.2 : 1.0 : 2.2                 |
|          | -14.20 (d, $J_{\text{P-H}} = 22.0$ Hz)/ap/ba       |                                 |
| <b>4</b> | -15.02 (t, $J_{\text{P-H}} = 21.6$ Hz)/trans-ba/ba | 19.3 : 1.0 : 3.5                |
|          | -14.66 (t, $J_{\text{P-H}} = 20.4$ Hz)/cis-ba/ba   |                                 |
|          | -14.20 (d, $J_{\text{P-H}} = 22.0$ Hz)/ap/ba       |                                 |
| <b>5</b> | -15.02 (t, $J_{\text{P-H}} = 21.6$ Hz)/trans-ba/ba | 2.0 : 1.0 : 1.4                 |
|          | -14.66 (t, $J_{\text{P-H}} = 19.6$ Hz)/cis-ba/ba   |                                 |
|          | -14.20 (d, $J_{\text{P-H}} = 22.0$ Hz)/ap/ba       |                                 |
| <b>6</b> | -15.03 (t, $J_{\text{P-H}} = 21.6$ Hz)/trans-ba/ba | 3.3 : 0 : 1.0                   |
|          | -14.20 (d, $J_{\text{P-H}} = 22.0$ Hz)/ap/ba       |                                 |
| <b>7</b> | -15.03 (t, $J_{\text{P-H}} = 21.6$ Hz)/trans-ba/ba | 1.6 : 1.0 : 1.4                 |
|          | -14.66 (t, $J_{\text{P-H}} = 19.6$ Hz)/cis-ba/ba   |                                 |
|          | -14.20 (d, $J_{\text{P-H}} = 22.0$ Hz)/ap/ba       |                                 |

**Table S4.** In situ  $^3\text{P}\{^1\text{H}\}$  NMR data of complexes **2–7** taken after the 5 min protonation reactions of complex **1** with the corresponding acids

| complex  | spectral data/isomer assignment                                                                        | molar ratio<br>trans-ba/ba : cis-ba/ba : ap/ba |
|----------|--------------------------------------------------------------------------------------------------------|------------------------------------------------|
| <b>2</b> | 21.10 (s)/trans-ba/ba<br>18.83 (s)/cis-ba/ba                                                           | only trans-ba/ba                               |
| <b>3</b> | 21.08 (s)/trans-ba/ba<br>22.78(d, $J = 7.8$ Hz), 21.66 (d, $J = 7.8$ Hz)/ap/ba<br>18.79 (s)/cis-ba/ba  | 2.4 : 0.5 : 1.0                                |
| <b>4</b> | 21.10 (s)/trans-ba/ba<br>22.75(d, $J = 7.8$ Hz), 21.63 (d, $J = 7.8$ Hz)/ap/ba<br>18.80 (s)/cis-ba/ba  | 4.6 : 0.2 : 1.0                                |
| <b>5</b> | 21.10 (s)/trans-ba/ba<br>22.77(d, $J = 7.8$ Hz), 21.65 (d, $J = 7.8$ Hz)/ap/ba                         | 1.1 : 0.5 : 1.0                                |
| <b>6</b> | 21.05 (s)/trans-ba/ba<br>22.76 (d, $J = 7.8$ Hz), 21.60 (d, $J = 7.8$ Hz) ap/ba<br>18.79 (s)/cis-ba/ba | 2.6 : 0 : 1.0                                  |
| <b>7</b> | 21.10 (s)/trans-ba/ba<br>22.75(d, $J = 7.8$ Hz), 21.63 (d, $J = 7.8$ Hz)/ap/ba                         | 1.1 : 0.6 : 1.0                                |

**Table S5.** In situ  $^1\text{H}$  NMR data of  $\mu\text{-H}$  in complex **5** taken at time intervals during the protonation reactions of complex **1** with  $\text{HBF}_4\cdot\text{Et}_2\text{O}$

| reaction time<br>(min) | spectral data/isomer assignment                                                                                                                        | molar ratio<br>trans-ba/ba : cis-ba/ba : ap/ba |
|------------------------|--------------------------------------------------------------------------------------------------------------------------------------------------------|------------------------------------------------|
| 5                      | -14.99 (t, $J_{\text{P-H}} = 21.6$ Hz)/trans-ba/ba<br>-14.63 (t, $J_{\text{P-H}} = 22.0$ Hz)/cis-ba/ba<br>-14.17 (d, $J_{\text{P-H}} = 22.0$ Hz)/ap/ba | 1.3 : 1.0 : 1.2                                |
| 15                     | -14.99 (t, $J_{\text{P-H}} = 21.6$ Hz)/trans-ba/ba<br>-14.63 (t, $J_{\text{P-H}} = 22.0$ Hz)/cis-ba/ba<br>-14.17 (d, $J_{\text{P-H}} = 22.0$ Hz)/ap/ba | 3.0 : 1.0 : 1.9                                |
| 25                     | -14.99 (t, $J_{\text{P-H}} = 21.6$ Hz)/trans-ba/ba<br>-14.63 (t, $J_{\text{P-H}} = 22.0$ Hz)/cis-ba/ba<br>-14.17 (d, $J_{\text{P-H}} = 22.0$ Hz)/ap/ba | 7.5 : 1.0 : 2.4                                |
| 35                     | -14.99 (t, $J_{\text{P-H}} = 21.6$ Hz)/trans-ba/ba<br>-14.63 (t, $J_{\text{P-H}} = 22.0$ Hz)/cis-ba/ba<br>-14.17 (d, $J_{\text{P-H}} = 22.0$ Hz)/ap/ba | 15.3 : 1.0 : 2.4                               |
| 45                     | -14.99 (t, $J_{\text{P-H}} = 21.6$ Hz)/trans-ba/ba<br>-14.63 (t, $J_{\text{P-H}} = 22.0$ Hz)/cis-ba/ba<br>-14.17 (d, $J_{\text{P-H}} = 22.0$ Hz)/ap/ba | 28.2 : 1.0 : 3.1                               |
| 85                     | -14.99 (t, $J_{\text{P-H}} = 21.6$ Hz)/trans-ba/ba                                                                                                     | only trans-ba/ba                               |

**Table S6.** In situ  $^{31}\text{P}\{^1\text{H}\}$  NMR data of complex **5** taken at time intervals during the protonation reactions of complex **1** with  $\text{HBF}_4\cdot\text{Et}_2\text{O}$ 

| reaction time<br>(min) | spectral data/isomer assignment                                                                       | molar ratio<br>trans-ba/ba : cis-ba/ba : ap/ba |
|------------------------|-------------------------------------------------------------------------------------------------------|------------------------------------------------|
| 5                      | 18.80 (s)/cis-ba/ba<br>21.10 (s)/trans-ba/ba<br>22.75(d, $J = 7.8$ Hz), 21.63 (d, $J = 7.8$ Hz)/ap/ba | 2.1 : 1.0 : 2.0                                |
| 15                     | 18.80 (s)/cis-ba/ba<br>21.10 (s)/trans-ba/ba<br>22.75(d, $J = 7.8$ Hz), 21.63 (d, $J = 7.8$ Hz)/ap/ba | 3.1 : 0.82 : 2.0                               |
| 25                     | 18.80 (s)/cis-ba/ba<br>21.10 (s)/trans-ba/ba<br>22.75(d, $J = 7.8$ Hz), 21.63 (d, $J = 7.8$ Hz)/ap/ba | 6.1 : 0.75 : 2.0                               |
| 35                     | 18.80 (s)/cis-ba/ba<br>21.10 (s)/trans-ba/ba<br>22.75(d, $J = 7.8$ Hz), 21.63 (d, $J = 7.8$ Hz)/ap/ba | 11.5 : 0.76 : 2.0                              |
| 45                     | 18.80 (s)/cis-ba/ba<br>21.10 (s)/trans-ba/ba<br>22.75(d, $J = 7.8$ Hz), 21.63 (d, $J = 7.8$ Hz)/ap/ba | 17.8 : 0.80 : 2.0                              |
| 85                     | 21.10 (s)/trans ba/ba                                                                                 | only trans-ba/ba                               |

**Table S7** Selected bond lengths (Å) and angles (°) for **8**

|                 |            |                  |            |
|-----------------|------------|------------------|------------|
| Fe(1)–C(2)      | 1.789(5)   | Fe(1)–Fe(2)      | 2.5866(13) |
| Fe(1)–P(1)      | 2.2597(13) | S(1)–C(5)        | 1.838(4)   |
| Fe(1)–S(1)      | 2.2681(12) | S(2)–C(6)        | 1.757(5)   |
| Fe(1)–D         | 1.70(4)    | Fe(2)–D          | 1.61(4)    |
| C(1)–Fe(1)–P(1) | 91.58(16)  | Fe(1)–S(1)–Fe(2) | 69.40(4)   |
| C(1)–Fe(1)–S(1) | 169.21(14) | P(1)–Fe(1)–D     | 87.0(14)   |
| P(1)–Fe(1)–S(1) | 88.40(5)   | C(2)–Fe(1)–D     | 178.1(13)  |
| P(1)–Fe(1)–S(3) | 163.30(5)  | Fe(1)–Fe(2)–D    | 39.9(14)   |

**Table S8** Crystal data and structure refinements details for **1**, **3** and **4**

|                                                   | <b>1</b>                                                                                     | <b>3</b>                                                                                       | <b>4</b>                                                                                                    |
|---------------------------------------------------|----------------------------------------------------------------------------------------------|------------------------------------------------------------------------------------------------|-------------------------------------------------------------------------------------------------------------|
| Formula                                           | C <sub>12</sub> H <sub>22</sub> Fe <sub>2</sub> O <sub>4</sub> P <sub>2</sub> S <sub>3</sub> | C <sub>12</sub> H <sub>23</sub> ClFe <sub>2</sub> O <sub>8</sub> P <sub>2</sub> S <sub>3</sub> | C <sub>12</sub> H <sub>23</sub> F <sub>6</sub> Fe <sub>2</sub> O <sub>4</sub> P <sub>3</sub> S <sub>3</sub> |
| <i>M<sub>w</sub></i>                              | 500.12                                                                                       | 600.57                                                                                         | 646.09                                                                                                      |
| Cryst syst                                        | Monoclinic                                                                                   | Monoclinic                                                                                     | Monoclinic                                                                                                  |
| Space group                                       | C2/c                                                                                         | P2(1)/n                                                                                        | C2/c                                                                                                        |
| <i>a</i> (Å)                                      | 17.214(9)                                                                                    | 13.1779(5)                                                                                     | 20.742(3)                                                                                                   |
| <i>b</i> (Å)                                      | 10.277(5)                                                                                    | 8.7547(3)                                                                                      | 8.9084(11)                                                                                                  |
| <i>c</i> (Å)                                      | 12.324(6)                                                                                    | 20.2242(7)                                                                                     | 13.7249(17)                                                                                                 |
| <i>α</i> (°)                                      | 90                                                                                           | 90                                                                                             | 90                                                                                                          |
| <i>β</i> (°)                                      | 100.177(6)                                                                                   | 103.3770(10)                                                                                   | 103.040(2)                                                                                                  |
| <i>γ</i> (°)                                      | 90                                                                                           | 90                                                                                             | 90                                                                                                          |
| <i>V</i> (Å <sup>3</sup> )                        | 2145.9(19)                                                                                   | 2269.93(14)                                                                                    | 2470.6(5)                                                                                                   |
| <i>Z</i>                                          | 4                                                                                            | 4                                                                                              | 4                                                                                                           |
| Crystal size (mm)                                 | 0.18 × 0.16 × 0.10                                                                           | 0.18 × 0.17 × 0.15                                                                             | 0.46 × 0.34 × 0.30                                                                                          |
| <i>D<sub>c</sub></i> (g·cm <sup>-3</sup> )        | 1.548                                                                                        | 1.757                                                                                          | 1.737                                                                                                       |
| <i>μ</i> (mm <sup>-1</sup> )                      | 1.804                                                                                        | 1.848                                                                                          | 1.683                                                                                                       |
| <i>F</i> (000)                                    | 1024                                                                                         | 1224                                                                                           | 1304                                                                                                        |
| Reflns collected                                  | 5618                                                                                         | 12755                                                                                          | 6507                                                                                                        |
| Reflns unique                                     | 1893                                                                                         | 4001                                                                                           | 2190                                                                                                        |
| <i>θ</i> <sub>min/max</sub> (°)                   | 2.32/25.00                                                                                   | 2.07/25.00                                                                                     | 2.50/25.02                                                                                                  |
| Final <i>R</i>                                    | 0.0315                                                                                       | 0.0244                                                                                         | 0.0404                                                                                                      |
| Final <i>R<sub>w</sub></i>                        | 0.0867                                                                                       | 0.0582                                                                                         | 0.1141                                                                                                      |
| GOF on <i>F</i> <sup>2</sup>                      | 1.094                                                                                        | 1.072                                                                                          | 1.052                                                                                                       |
| <i>Δρ</i> <sub>max/min</sub> (e Å <sup>-3</sup> ) | 0.350/−0.303                                                                                 | 0.520/−0.266                                                                                   | 0.386/−0.440                                                                                                |



**Table S9** Crystal data and structure refinements details for **5** and **8**

|                                                   | <b>5</b>                                                                                                     | <b>8</b>                                                                                                     |
|---------------------------------------------------|--------------------------------------------------------------------------------------------------------------|--------------------------------------------------------------------------------------------------------------|
| Formula                                           | C <sub>12</sub> H <sub>23</sub> BF <sub>4</sub> Fe <sub>2</sub> O <sub>4</sub> P <sub>2</sub> S <sub>3</sub> | C <sub>13</sub> H <sub>22</sub> DF <sub>3</sub> Fe <sub>2</sub> O <sub>7</sub> P <sub>2</sub> S <sub>4</sub> |
| <i>M<sub>w</sub></i>                              | 587.93                                                                                                       | 651.20                                                                                                       |
| Cryst syst                                        | Monoclinic                                                                                                   | Monoclinic                                                                                                   |
| Space group                                       | P21/c                                                                                                        | P2(1)/c                                                                                                      |
| <i>a</i> (Å)                                      | 13.2814(7)                                                                                                   | 11.214(2)                                                                                                    |
| <i>b</i> (Å)                                      | 17.4609(9)                                                                                                   | 18.025(4)                                                                                                    |
| <i>c</i> (Å)                                      | 21.0295(9)                                                                                                   | 13.720(3)                                                                                                    |
| <i>α</i> (°)                                      | 90                                                                                                           | 90                                                                                                           |
| <i>β</i> (°)                                      | 111.970(2)                                                                                                   | 112.30(3)                                                                                                    |
| <i>γ</i> (°)                                      | 90                                                                                                           | 90                                                                                                           |
| <i>V</i> (Å <sup>3</sup> )                        | 4522.7(4)                                                                                                    | 2565.8(9)                                                                                                    |
| <i>Z</i>                                          | 8                                                                                                            | 4                                                                                                            |
| Crystal size (mm)                                 | 0.18 × 0.17 × 0.16                                                                                           | 0.20 × 0.18 × 0.12                                                                                           |
| <i>D<sub>c</sub></i> (g cm <sup>-3</sup> )        | 1.727                                                                                                        | 1.686                                                                                                        |
| <i>μ</i> (mm <sup>-1</sup> )                      | 1.750                                                                                                        | 1.633                                                                                                        |
| <i>F</i> (000)                                    | 2384                                                                                                         | 1324                                                                                                         |
| Reflns collected                                  | 25853                                                                                                        | 25386                                                                                                        |
| Reflns unique                                     | 7967                                                                                                         | 6063                                                                                                         |
| <i>θ</i> <sub>min/max</sub> (°)                   | 1.57/25.01                                                                                                   | 2.26/27.85                                                                                                   |
| Final <i>R</i>                                    | 0.0669                                                                                                       | 0.0624                                                                                                       |
| Final <i>R<sub>w</sub></i>                        | 0.1865                                                                                                       | 0.1845                                                                                                       |
| GOF on <i>F</i> <sup>2</sup>                      | 0.925                                                                                                        | 1.096                                                                                                        |
| <i>Δρ</i> <sub>max/min</sub> (e Å <sup>-3</sup> ) | 1.926/−1.698                                                                                                 | 1.621/−0.661                                                                                                 |

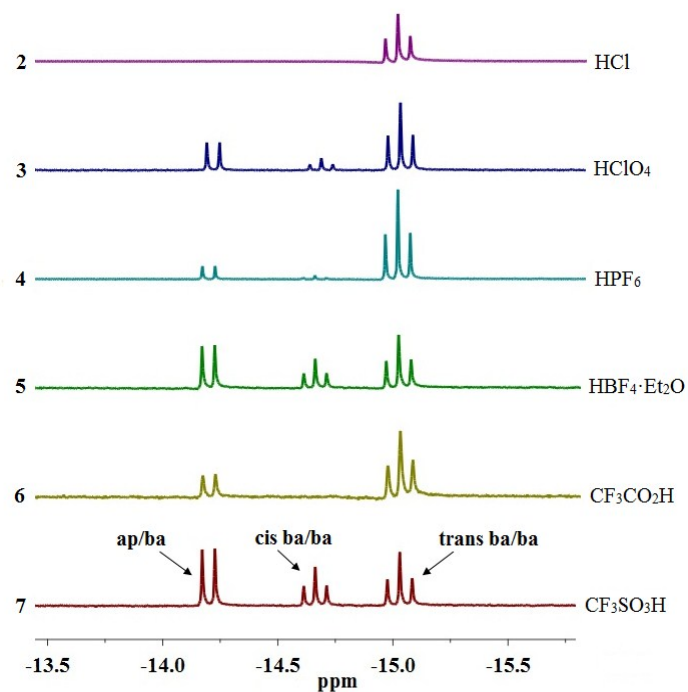

**Fig. S1** In situ  $^1\text{H}$  NMR spectra of  $\mu\text{-H}$  in complexes **2–7** taken after the 5 min protonation reactions of complex **1** with the corresponding acids.

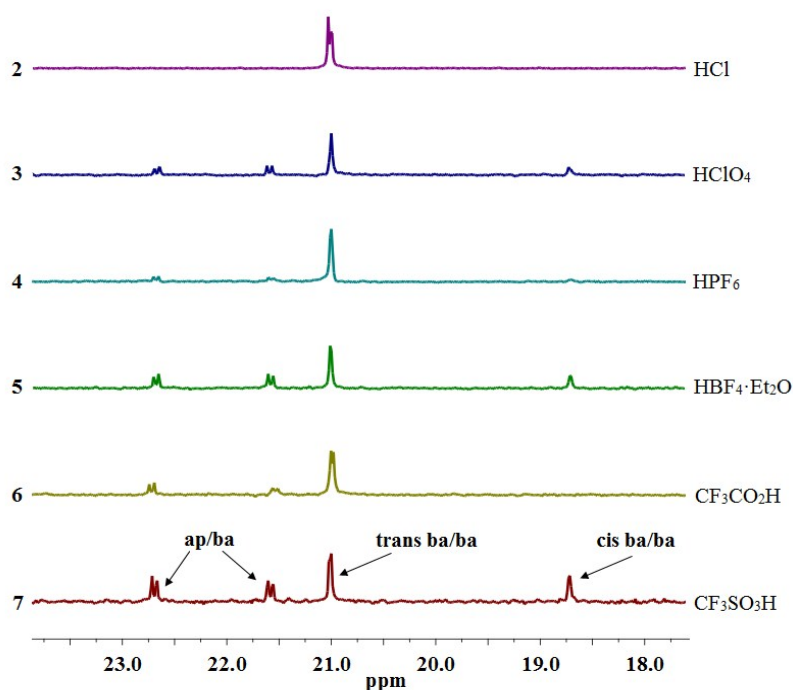

**Fig. S2** In situ  $^{31}\text{P}\{^1\text{H}\}$  NMR spectra of complexes **2–7** taken after the 5 min protonation reactions of complex **1** with the corresponding acids.

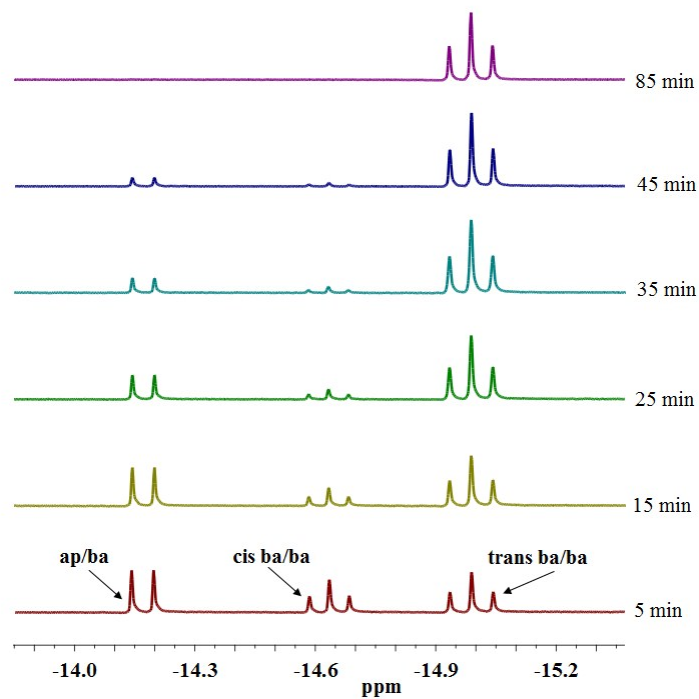

**Fig. S3** In situ  $^1\text{H}$  NMR spectra of  $\mu\text{-H}$  in complex **5** taken at time intervals during the protonation reactions of complex **1** with  $\text{HBF}_4\cdot\text{Et}_2\text{O}$ .

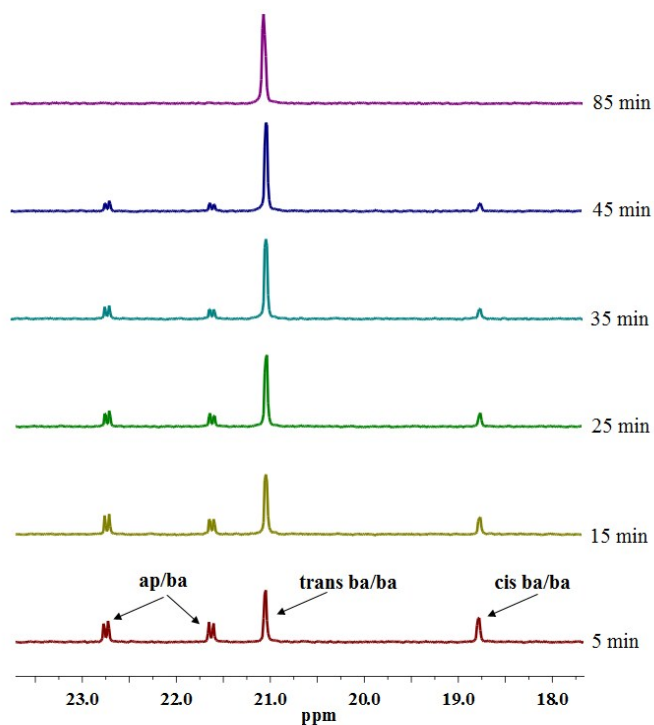

**Fig. S4** In situ  $^{31}\text{P}\{^1\text{H}\}$  NMR spectra in complex **5** taken at time intervals during the protonation reactions of complex **1** with  $\text{HBF}_4\cdot\text{Et}_2\text{O}$ .

## Discussion of the unsuccessful H/D exchange results

### (i) Attempted H/D exchange between **7** and D<sub>2</sub>

As described in Experimental Section, the H/D exchange reaction of complex **7** with D<sub>2</sub> was carried out at room temperature in a J-Young NMR tube containing a CD<sub>2</sub>Cl<sub>2</sub> (for <sup>1</sup>H NMR determination) or CH<sub>2</sub>Cl<sub>2</sub> (for <sup>2</sup>H NMR determination) solution of complex **7** and filled with D<sub>2</sub> pressured to 2 bar. Unfortunately, after the reaction system was exposed to ambient laboratory light for 3 days or left in the dark for 3 days, the in situ <sup>1</sup>H and <sup>2</sup>H NMR spectra proved that the H/D exchange reaction between **7** and D<sub>2</sub> did not occur under such conditions. This is because the <sup>1</sup>H NMR signal for the expected H/D exchange product HD ( $\delta_{\text{H}}$ : a triplet at 4.57 ppm with  $J_{\text{D-H}} = 42.51$  Hz, see: D. Sellmann and A. Fürsattel, *Angew. Chem. Int. Ed.*, 1999, **38**, 2023-2026) or the <sup>2</sup>H NMR signal for the expected H/D exchange product **8** ( $\delta_{\mu\text{-D}}$ : a triplet at -14.33 ppm with  $J_{\text{P-D}} = 3.23$  Hz) was not observed.

### (ii) Attempted H/D exchange between **7** and D<sub>2</sub>O

Similarly, the study on the H/D exchange reaction between **7** and D<sub>2</sub>O was carried out at room temperature in an NMR tube containing an acetone-d<sub>6</sub> (for <sup>1</sup>H NMR determination) or acetone (for <sup>2</sup>H NMR determination) solution of complex **7** and excess D<sub>2</sub>O under irradiation of ambient laboratory light for 3 days or in the dark for 3 days. The in situ <sup>2</sup>H NMR spectra demonstrated that the H/D exchange reaction of **7** with D<sub>2</sub>O could not occur also under such conditions, since no <sup>2</sup>H NMR signal for the expected  $\mu$ -deuterium complex **8** ( $\delta_{\mu\text{-D}}$ : a triplet at -14.33 ppm with  $J_{\text{P-D}} = 3.23$  Hz) was observed.
